# Supplementary material
Source: ML conference proceedings conference paper supplement (https://proceedings.neurips.cc/paper_files/paper/2014/hash/cc1aa436277138f61cda703991069eaf-Abstract.html)
Supplement: Supplementary file [file cc1aa436277138f61cda703991069eaf-Supplemental.zip]

## Appendix

### A Omitted Proofs of Lemmas

#### A.1 Proof of Lemma 2

Let there be  $k$  targets  $t$  such that  $p_t > q_t$ . We prove this lemma by induction on  $k$ . For  $k = 0$ , the lemma trivially holds. Assume that for all  $k < k_0$  the result holds. Let  $k = k_0$ . Let  $t$  be an arbitrary target for which  $p_t > q_t$ . Since the set of pure strategies is closed under subset operation there is a map,  $\sigma(\cdot)$ , such that for every pure strategy  $M_i$  (a column in matrix  $M$ ) such that  $M_{ti} = 1$ ,  $M_{\sigma(i)}$  only differs from  $M_i$  in the  $t^{th}$  row (target). Let  $I$  and  $I'$  indicate these strategies i.e.  $I = \{i : M_{ti} = 1\}$ ,  $I' = \{\sigma(i) : M_{ti} = 1\}$ .

Define  $\mathbf{s}'$  as follows: For all  $i \in I$ , let  $s'_i = s_i \cdot \frac{q_t}{p_t}$  and  $s'_{\sigma(i)} = s_{\sigma(i)} + s_i \cdot \frac{p_t - q_t}{q_t}$ , and for any  $i \notin I \cup I'$ , let  $s'_i = s_i$ . Consider  $\mathbf{p}'$  that is induced by  $\mathbf{s}'$ : For  $t$ ,  $p'_t = \sum_{i: M_{ti}=1} s'_i = \sum_{i \in I} s_i \cdot \frac{q_t}{p_t} = q_t$ . For all  $t' \neq t$ ,

$$\begin{aligned} p'_{t'} &= \sum_{i: M_{t'i}=1} s'_i = \sum_{\substack{i: M_{t'i}=1 \\ \text{and } i \in I}} \left( s'_i + s'_{\sigma(i)} \right) + \sum_{\substack{i: M_{t'i}=1 \\ \text{and } i \notin I \cup I'}} s'_i \\ &= \sum_{\substack{i: M_{t'i}=1 \\ \text{and } i \in I}} \left( \frac{q_t}{p_t} s_i + s_{\sigma(i)} + \frac{p_t - q_t}{p_t} s_i \right) + \sum_{\substack{i: M_{t'i}=1 \\ \text{and } i \notin I \cup I'}} s_i \\ &= \sum_{\substack{i: M_{t'i}=1 \\ \text{and } i \in I}} (s_i + s_{\sigma(i)}) + \sum_{\substack{i: M_{t'i}=1 \\ \text{and } i \notin I \cup I'}} s_i = \sum_{i: M_{t'i}=1} s_i \\ &= p_{t'} \end{aligned}$$

We conclude that  $\mathbf{p}'$  such that  $p'_t = q_t$  and for all  $t' \neq t$ ,  $p'_{t'} = p_{t'}$ , is implementable.  $\mathbf{p}'$  and  $\mathbf{q}$  differ in only  $k_0 - 1$  indices and for all  $i$ ,  $p'_i \geq q_i$ , so using the induction hypothesis  $\mathbf{q}$  is implementable.  $\square$

#### A.2 Proof of Lemma 3

(1  $\implies$  2). Consider the minimal set of half-spaces that defines  $A$ . We know that this set is unique, and is the collection of facet-defining half-spaces. Since  $A$  has a positive volume, for all  $i$ ,  $(\mathbf{e}_i, \epsilon)$  is a facet, so it belongs to the set of half-spaces that define  $A$ . Take any half-space  $(\mathbf{h}, b)$  in this collection that is not of the form  $(\mathbf{e}_i, \epsilon)$ . There is a point  $\mathbf{p}$  on the the boundary of  $(\mathbf{h}, b)$  that is not on the boundary of any other half-space (including  $(\mathbf{e}_i, \epsilon)$ ), so  $\mathbf{p} \succ \epsilon$ . For every  $i$ , define  $\mathbf{p}^i$  such that  $p^i_i = \epsilon$  and  $p^i_j = p_j$  for all  $j \neq i$ . Then,

$$\mathbf{h} \cdot \mathbf{p}^i = \mathbf{h} \cdot \mathbf{p} + \mathbf{h} \cdot (\mathbf{p}^i - \mathbf{p}) = b - h_i(p_i - \epsilon).$$

Since  $\mathbf{p}^i \in A$ ,  $h_i \leq 0$ . Since,  $\epsilon \in A$ ,  $\mathbf{h} \cdot \epsilon = -\|\mathbf{h}\|_1 \epsilon \geq b$ , so  $b \leq -\epsilon$ .

(2  $\implies$  1). For any  $\mathbf{p} \in A$  and any  $\epsilon \preceq \mathbf{q} \preceq \mathbf{p}$ , and any  $i$ ,  $\mathbf{e}_i \cdot \mathbf{q} = q_i \geq \epsilon$ . For any  $(\mathbf{h}, b) \in H$  of the second form,

$$\mathbf{h} \cdot \mathbf{q} = \mathbf{h} \cdot \mathbf{p} + \mathbf{h} \cdot (\mathbf{q} - \mathbf{p}) \geq b,$$

where the last transition is by the fact that  $\mathbf{h}$  and  $(\mathbf{q} - \mathbf{p})$  are non-positive. So,  $\mathbf{q} \in A$ .  $\square$

#### A.3 Proof of Lemma 4

Let  $\mathbf{p} \notin \mathcal{P}$ , by Lemma 3 one of the following cases holds: (1) There exists  $i$ , such that  $\mathbf{e}_i \cdot \mathbf{p} < 0$ . In this case,  $\mathbf{e}_i \cdot \mathbf{p} \leq k\gamma$ . So,  $\mathbf{p} \notin R^k$ . (2) There exists  $(\mathbf{h}^*, b^*) \in H_{\mathcal{P}}$  such that  $\mathbf{h}^* \cdot \mathbf{p} < b^*$ . Let  $(\mathbf{h}, b)$  be the corresponding half-space of  $(\mathbf{h}^*, b^*)$  in  $\mathcal{R}^k$ . Then,

$$\mathbf{h} \cdot \mathbf{p} = \mathbf{h}^* \cdot \mathbf{p} + (\mathbf{h} - \mathbf{h}^*) \cdot \mathbf{p} < b^* + (\mathbf{h} - \mathbf{h}^*) \cdot \mathbf{p} < b$$

where the last transition is by the fact that  $\mathbf{h} \preceq \mathbf{h}^*$ ,  $b > b^*$ , and  $\mathbf{p} \succeq \mathbf{0}$ .  $\square$

#### A.4 Proof of Lemma 5

If  $\mathcal{R}^k = \emptyset$  is empty then the result holds trivially. If  $\mathcal{R}^k \neq \emptyset$ , then there exists  $\mathbf{p} \succeq k\gamma$  such that  $\mathbf{p} \in \mathcal{R}^k$ . By Lemmas 2 and 3,  $\mathcal{P}$  has half-spaces of the form  $(\mathbf{e}_i, 0)$  and  $(\mathbf{h}^*, b^*)$ , such that  $\mathbf{h}^* \preceq \mathbf{0}$  and  $b^* \leq 0$ . By construction of  $\mathcal{R}^k$ , we have half-spaces of the form  $(\mathbf{e}_i, k\gamma)$  for all  $i$ , and half-spaces  $(\mathbf{h}, b + k\gamma)$  such that  $\mathbf{h} = \lfloor \frac{1}{\gamma} \mathbf{h}^* \rfloor \preceq \mathbf{h}^*$ . Since,  $k\gamma \preceq \mathbf{p} \in \mathcal{R}^k$ ,  $\mathbf{h} \cdot k\gamma = \|\mathbf{h}\|_1 k\gamma \geq b$ . So,  $b \leq -k\gamma$ . The proof is completed by the fact that the conditions of Lemma 3 hold.  $\square$

#### A.5 Proof of Lemma 6

Note that there is a positive gap between the attacker's payoff from attacking a best-response target versus another target, i.e.  $\min_{t \notin B} U_a(t^*, p_{t^*}) - U_a(t, p_t) > 0$ . Since  $U_a$  is continuous and decreasing in the coverage probability, for any  $t \notin B$ , if  $p_t > k\gamma$  there exists  $0 < \delta \leq p_t - k\gamma$  such that  $U_a(t^*, p_{t^*}) > U_a(t, p_t - \delta)$ . Let  $\mathbf{q}$  be defined such that for all  $t \notin B$ ,  $q_t = p_t - \delta \geq k\gamma$ , and for all  $t \in B$ ,  $q_t = p_t$ . Then by Lemma 5,  $\mathbf{q}$  is implementable by some strategy  $\mathbf{s}_q$  in  $\mathcal{R}^k$ . Furthermore,  $b(\mathbf{q}) = t^*$ , so,  $\mathbf{s}_q$  is also an optimal strategy. This contradicts the fact that  $\mathbf{s}$  is a conservative optimal strategy.  $\square$

#### A.6 Proof of Lemma 7

Let  $\mathbf{p}$  be the center of the ball. Then for any  $i$ ,  $p_i \geq r \geq k\gamma$ , so  $\mathbf{e}_i \cdot \mathbf{p} \geq k\gamma$ . For any  $(\mathbf{h}, b)$  defining half-space of  $\mathcal{R}^k$  and its corresponding half-space  $(\mathbf{h}^*, b^*)$  of  $\mathcal{P}$  we have:

$$\mathbf{h} \cdot \mathbf{p} - b = \mathbf{h}^* \cdot \mathbf{p} - b^* + (\mathbf{h} - \mathbf{h}^*) \cdot \mathbf{p} + (b^* - b) \geq r - \gamma n - (\gamma + k\gamma) \geq 0,$$

where the second transition is by the fact that  $\mathbf{h}^* \cdot \mathbf{p} = r$  is the margin of  $\mathbf{p}$  from a normalized half-space  $\mathbf{h}^*$ , and that for any value  $x$  and  $1/\gamma \in \mathbb{Z}$ ,  $\gamma \lfloor \frac{1}{\gamma} x \rfloor$  and  $\gamma \lceil \frac{1}{\gamma} x \rceil$  are within  $\gamma$  from  $x$ . Hence,  $\mathbf{p} \in \mathcal{R}_t^k$ .  $\square$

#### A.7 Proof of Lemma 9

The boundaries of  $\mathcal{R}^k$  are defined by  $(\mathbf{e}_i, k\gamma)$  for all  $i$  and a half-spaces  $(\mathbf{h}, b + k\gamma)$  for every half-space  $(\mathbf{h}^*, b^*) \in H_{\mathcal{P}}$  such that  $\mathbf{h} = \gamma \lfloor \frac{1}{\gamma} \mathbf{h}^* \rfloor$  and  $b = \gamma \lceil \frac{1}{\gamma} b^* \rceil$ . In addition  $\mathcal{R}_t^k$  is the intersection of  $\mathcal{R}^k$  with half-spaces  $U_t(t, p_t) \geq U(t', p_{t'})$  for all  $t' \neq t$ . Let  $\text{dist}(\cdot)$  denote the signed distance of a point from a half-space. For every  $i \neq t$ ,

$$\begin{aligned} \text{dist}(\mathbf{q}, (\mathbf{e}_i, (k-1)\gamma)) &= \frac{\mathbf{e}_i \cdot \mathbf{q} - (k-1)\gamma}{\|\mathbf{e}_i\|_2} = q_i - (k-1)\gamma \geq p_i + \frac{\gamma}{4\sqrt{n}} - (k-1)\gamma \\ &\geq k\gamma + \frac{\gamma}{4\sqrt{n}} - (k-1)\gamma > \frac{\gamma}{2n}. \end{aligned}$$

Moreover,

$$\begin{aligned} \text{dist}(\mathbf{q}, (\mathbf{e}_t, (k-1)\gamma)) &= \frac{\mathbf{e}_t \cdot \mathbf{q} - (k-1)\gamma}{\|\mathbf{e}_t\|_2} = q_t - (k-1)\gamma = p_t - \frac{\gamma}{2} - (k-1)\gamma \\ &\geq k\gamma - \frac{\gamma}{2} - (k-1)\gamma \geq \frac{\gamma}{2n}. \end{aligned}$$

Finally, for every  $(\mathbf{h}, b + (k-1)\gamma)$ ,

$$\begin{aligned} \text{dist}(\mathbf{q}, (\mathbf{h}, b + (k-1)\gamma)) &= \frac{\mathbf{h} \cdot \mathbf{q} - (b + (k-1)\gamma)}{\|\mathbf{h}\|_2} \geq \frac{\mathbf{h} \cdot \mathbf{p} + \mathbf{h} \cdot (\mathbf{q} - \mathbf{p}) - (b + (k-1)\gamma)}{2} \\ &\geq \frac{\mathbf{h} \cdot (\mathbf{q} - \mathbf{p}) + \gamma}{2} \geq -\frac{\gamma}{8\sqrt{n}} \|\mathbf{h}\|_1 - h_t \left( \frac{\gamma}{4} + \frac{\gamma}{8\sqrt{n}} \right) + \frac{\gamma}{2} \\ &\geq -\frac{\gamma}{8\sqrt{n}} \|\mathbf{h}\|_1 + \frac{\gamma}{2} \geq -\frac{\gamma}{8\sqrt{n}} (\sqrt{n} + n\gamma) + \frac{\gamma}{2} \\ &\geq \frac{3\gamma}{8} - \frac{\sqrt{n}\gamma^2}{8} \geq \frac{\gamma}{2n}, \end{aligned}$$

where the first inequality is by the fact that  $\|\mathbf{h}\|_2 \leq \|\mathbf{h}^*\|_2 + \gamma\sqrt{n} \leq 1 + \gamma\sqrt{n} < 2$  (by the triangle inequality), the penultimate inequality is by the fact that  $\|\mathbf{h}\|_1 \leq \|\mathbf{h}^*\|_1 + n\gamma \leq \sqrt{n}\|\mathbf{h}^*\|_2 + n\gamma$ , and the last inequality follows from  $\gamma = \frac{1}{(n+1)2^{L+1}} < \frac{1}{n\sqrt{n}}$ .

As for the utility half-spaces of the form  $U_a(t, q_t) - U_a(t', q_{t'}) \geq 0$ , for every  $t'$ , the probability  $\mathbf{q}$  has moved away by at least  $\min(\frac{\gamma}{2}, \frac{\gamma}{4\sqrt{n}}) \geq \frac{\gamma}{2n}$  from every half-space. Moreover, by reducing the coverage probability on the attacked target and increasing it on other targets, the attacker receives even larger payoff from attacking  $t$ , so  $\mathbf{q}$  still induces an attack on  $t$ , i.e.  $\mathbf{q} \in \mathcal{P}_t$ . Finally, the signed distance of  $\mathbf{q}$  from every half-space is greater than  $\frac{\gamma}{2n}$ , therefore  $\mathbf{q} \in \mathcal{R}^{k-1} \cap \mathcal{P}_t = \mathcal{R}_t^{k-1}$ , and it has distance  $\frac{\gamma}{2n}$  from the boundaries of  $\mathcal{R}_t^{k-1}$ .  $\square$

## A.8 Proof of Lemma 10

Let  $\mathcal{R}_t^k$  be represented as a system  $\{\mathbf{p} : A\mathbf{p}^T \succeq \mathbf{b}\}$  where there is a row (constraint) for each half-space that defines  $\mathcal{R}_t^k$ , and a row for each  $t' \neq t$  of the form  $U_a(t, p_t) - U_a(t', p_{t'}) \geq 0$ . Furthermore, assume that  $A$  is normalized so that every row has integral coefficients. Note that by the definition of the game representation length, each coefficient of the utility rows is at most  $2^L$ . Moreover, by the definition of the defining half-spaces of  $\mathcal{R}_t^k$ , each coefficients of the feasibility constraints are at most  $(n+1)2^{L+1}$ .

We know that each basic solution to the above LP is at the intersection of  $n$  independent constraints of  $A$ . Let  $\mathbf{p}^*$  be such a solution. Let  $D$  represent those  $n$  hyper-planes. Using Cramer's rule, for all  $i$ ,  $p_i^* = \frac{\det(D_i)}{\det(D)}$ , where the  $D_i$  is  $D$  with its  $i^{th}$  column replaced by  $\mathbf{b}$ . Using Hadamard's inequality,

$$\det(D) \leq \prod_{i=1}^n \sqrt{\sum_{j=1}^n d_{ij}^2} \leq \prod_{i=1}^n (n+1)2^{L+1}\sqrt{n} \leq n^{2n}2^{n(L+1)} \leq 2^{2n(L+1)},$$

Where the last inequality is by the fact that  $L > n \log n$ .  $\square$

## A.9 Proof of Lemma 11

Let  $\mathbf{p}^*$  be the optimal strategy in  $\mathcal{R}_t^k$ . By Lemma 10, for all  $i$ ,  $p_i^*$  has a denominator of at most  $2^{2n(L+1)}$ . Note that the difference between two distinct rational numbers with denominators at most  $2^{2n(L+1)}$  is at least  $\frac{1}{2^{4n(L+1)}}$ .

Strategy  $\mathbf{p}$  is a  $\frac{1}{2^{6n(L+1)}}$ -approximate optimal strategy and the utilities have representation length of at most  $L$ , so

$$p_t^* - p_t \leq 2^L \cdot \frac{1}{2^{6n(L+1)}} < \frac{1}{2^{4n(L+1)}}.$$

Therefore,  $p_t^* \in [p_t, p_t + \frac{1}{2^{4n(L+1)}}]$ . Since this range is smaller than the difference between two rational numbers with denominator at most  $2^{2n(L+1)}$ , there is at most one such rational number in this range, to which our algorithm sets  $p_t^*$ . Note that the absence of such a rational number is contradictory to Lemma 10 or the fact that  $\mathbf{p}$  was a  $\frac{1}{2^{6n(L+1)}}$ -approximate optimal strategy.

For all  $i$ , let  $p'_i \geq k\gamma$  be the smallest coverage probability, with accuracy  $\frac{1}{2^{5n(L+1)}}$ , such that  $U_a(t, p_t) \geq U_a(i, p'_i)$ . Then,  $p_i^* \geq p'_i - \frac{1}{2^{5n(L+1)}}$ . Let  $r_i$  and  $q_i$ , respectively, be the smallest and second smallest rational numbers with denominator at most  $2^{2n(L+1)}$  in the range  $[p'_i - \frac{1}{2^{5n(L+1)}}, 1)$ . We claim that  $p_i^* = r_i$  or  $q_i$ . To prove this claim, it is sufficient to show that for all  $i$ ,  $U_a(i, q_i) \leq U_a(t, p_t^*)$ . Since  $q_i$  is the second smallest rational number with denominator at most  $2^{2n(L+1)}$  in the given range, then  $q_i \geq p'_i - \frac{1}{2^{5n(L+1)}} + \frac{1}{2^{4n(L+1)}} > \frac{1}{2^{4n(L+1)+1}}$ . Then,

$$\begin{aligned} U_a(i, p'_i) - U_a(i, q_i) &\geq \frac{1}{2^L} (q_i - p'_i) \geq \frac{1}{2^{4n(L+1)+L+1}} \\ &> \frac{2^L}{2^{6n(L+1)}} \geq 2^L (U_a(t, p_t^*) - U_a(t, p_t)) \\ &> U_a(t, p_t) - U_a(t, p_t^*). \end{aligned}$$

Since,  $U_a(t, p_t) \geq U_a(i, p'_i)$ , the above inequality implies that  $U_a(i, q_i) \leq U_a(t, p_t^*)$ . So, for each  $i$ , it is sufficient to query the attacker to see whether  $U_a(i, r_i) \leq U_a(t, p_t^*)$  if so then  $p_i^* = r_i$ , else  $p_i^* = q_i$ .

For each  $i$ , this algorithm makes  $O(\log 2^{5(L+1)}) = O(L)$  queries to find  $p'_i$  with accuracy  $\frac{1}{2^{5n(L+1)}}$ . Values of  $p_i^*$ ,  $r_i$  and  $q_i$  are computed without any best-response queries. Because  $p_i^* = r_i$  or  $q_i$ , step 4, is repeated at most  $n$  times, so there are  $n$  additional queries. In conclusion, our algorithm makes  $O(nL + n) = O(nL)$  many queries in total.  $\square$
